# Supplementary material for: Patterns of care for brachytherapy in Japan
Source: PubMed Central journal article supplement (PMC10959427; doi:10.1093/jrr/rrad099), 2023-12-26
Supplement: appendix_1_questionnaire_sheet_rrad099.pdf [file appendix_1_questionnaire_sheet_rrad099.pdf]

| No.                                                                                                                                        | Questionnaire                                                                                                                                                             | Choices                                                                                                                                                                                                          |
|--------------------------------------------------------------------------------------------------------------------------------------------|---------------------------------------------------------------------------------------------------------------------------------------------------------------------------|------------------------------------------------------------------------------------------------------------------------------------------------------------------------------------------------------------------|
| 1                                                                                                                                          | Facility name                                                                                                                                                             |                                                                                                                                                                                                                  |
| 2                                                                                                                                          | Location of the facility (prefecture)                                                                                                                                     |                                                                                                                                                                                                                  |
| 3                                                                                                                                          | Type of facility                                                                                                                                                          | University hospital or its branch · Base hospital for cancer treatment other than a university hospital · Cancer center · Other general hospital · Other                                                         |
| 4                                                                                                                                          | Name of respondent                                                                                                                                                        |                                                                                                                                                                                                                  |
| 5                                                                                                                                          | Please select the remote afterloading system (RALS) you use for high-dose-rate (HDR) brachytherapy. (Multiple choices allowed)                                            | MicroSelectron HDR · Flexitron HDR · Varisource · MutliSource ( <sup>192</sup> Ir-RALS) · MutliSource ( <sup>60</sup> Co-RALS) · BRAVOS · SagiNova ( <sup>192</sup> Ir-RALS) · SagiNova ( <sup>60</sup> Co-RALS) |
| 6                                                                                                                                          | Please select the low-dose-rate (LDR) brachytherapy system/ source you use. (Multiple choices allowed)                                                                    | <sup>125</sup> I permanent implantation system · <sup>192</sup> Ir(LDR) · <sup>137</sup> Cs (LDR) · <sup>198</sup> Au grain · <sup>106</sup> Ru-Rh · <sup>90</sup> Sr-Y                                          |
| Questions 7-10 relate to the number of healthcare workers; please state the number as at 1 April 2022.                                     |                                                                                                                                                                           |                                                                                                                                                                                                                  |
| 7                                                                                                                                          | Number of radiation oncologist (full-time + part-time)                                                                                                                    |                                                                                                                                                                                                                  |
| 8                                                                                                                                          | Number of nurses in radiation oncology department. The number was set at 0.5 for part-time workers who work 2 to 3 days per week.                                         |                                                                                                                                                                                                                  |
| 9                                                                                                                                          | Average number of radiation oncologists and residents involved in one brachytherapy procedur.                                                                             |                                                                                                                                                                                                                  |
| 10                                                                                                                                         | Average number of nurses involved in one brachytherapy procedure.                                                                                                         |                                                                                                                                                                                                                  |
| 11                                                                                                                                         | Average time spent on brachytherapy as a team of radiation oncologists and nurses per week. (hour)                                                                        |                                                                                                                                                                                                                  |
| 12                                                                                                                                         | Is it possible to increase the number of brachytherapy from the current level at your institution?                                                                        | Possible · At our maximum capacity · Already over capacity · Unknown                                                                                                                                             |
| 13                                                                                                                                         | Patient waiting periods for brachytherapy.                                                                                                                                | No waiting period · ≤1 week · 1 to 2 weeks · ≥2 weeks                                                                                                                                                            |
| 14                                                                                                                                         | Do you provide image-guided brachytherapy (IGBT)? (Please indicate the status as at 1 April 2022)                                                                         | Yes · No                                                                                                                                                                                                         |
| 15                                                                                                                                         | Reasons for not performing IGBT.                                                                                                                                          | Knowledge and technical problems · Lack of staff · Inadequate facilities · Lack of time · No need (2D is sufficient) · Inadequate reimbursement · Other (If other, please state in the next.)                    |
| 16                                                                                                                                         | Please state if the reason is other.                                                                                                                                      |                                                                                                                                                                                                                  |
| 17                                                                                                                                         | Do you accept patients for brachytherapy from other facilities? (as of 1 April 2022)                                                                                      | Yes · No                                                                                                                                                                                                         |
| 18                                                                                                                                         | Number of other facilities from where you accepts patients for BT. (One year, Jan-Dec 2021)                                                                               |                                                                                                                                                                                                                  |
| 19                                                                                                                                         | Location of the other facility from where you accepted the patients. (Multiple choices allowed)                                                                           | Same prefecture · Adjacent prefecture · Distant prefecture                                                                                                                                                       |
| 20                                                                                                                                         | Number of patients accepted from other facilities. (One year, Jan-Dec 2021)                                                                                               |                                                                                                                                                                                                                  |
| 21                                                                                                                                         | If you do not accept patients from other facilities, what are the reasons? (Multiple choices allowed)                                                                     | No referrals/ Referrals but cannot afford to accept/ Other (If other, please state in the next.)                                                                                                                 |
| 22                                                                                                                                         | Please state if the reason is other.                                                                                                                                      |                                                                                                                                                                                                                  |
| 23                                                                                                                                         | Are there neighbouring facilities (in the same or neighbouring prefecture) to which you can refer if you need brachytherapy that cannot be performed at your institution? | Yes · No                                                                                                                                                                                                         |
| In the following questions 24-56, please state the number of patients (new patients + return patients) from 1 January to 31 December 2021. |                                                                                                                                                                           |                                                                                                                                                                                                                  |

| Intracavitary brachytherapy (ICBT) using HDR-RALS                     |                                                                                                                               |  |
|-----------------------------------------------------------------------|-------------------------------------------------------------------------------------------------------------------------------|--|
| 24                                                                    | Esophagus                                                                                                                     |  |
| 25                                                                    | Bile duct                                                                                                                     |  |
| 26                                                                    | Bronchus                                                                                                                      |  |
| 27                                                                    | Rectum                                                                                                                        |  |
| 28                                                                    | Uterine cervix                                                                                                                |  |
| 29                                                                    | Uterine body                                                                                                                  |  |
| 30                                                                    | Vagina                                                                                                                        |  |
| 31                                                                    | List other diseases (if more than one, please list them all here).                                                            |  |
| 32                                                                    | Number of patients with other diseases. (Please provide the total number even if there is more than one disease.)             |  |
| Intracavitary and Interstitial brachytherapy (IC/ISBT) using HDR-RALS |                                                                                                                               |  |
| 33                                                                    | Uterine cervix                                                                                                                |  |
| 34                                                                    | Uterine body                                                                                                                  |  |
| 35                                                                    | Vagina                                                                                                                        |  |
| Interstitial brachytherapy (ISBT) using HDR-RALS                      |                                                                                                                               |  |
| 36                                                                    | Head and neck                                                                                                                 |  |
| 37                                                                    | Breast (SAVI catheter)                                                                                                        |  |
| 38                                                                    | Breast (Multicatheter)                                                                                                        |  |
| 39                                                                    | Uterine cervix                                                                                                                |  |
| 40                                                                    | Uterine body                                                                                                                  |  |
| 41                                                                    | Vagina                                                                                                                        |  |
| 42                                                                    | Prostate                                                                                                                      |  |
| 43                                                                    | List other diseases. (If more than one, please list them all here).                                                           |  |
| 44                                                                    | Number of patients with other diseases. (Please provide the total number even if there is more than one disease.)             |  |
| Mold brachytherapy using HDR-RALS                                     |                                                                                                                               |  |
| 45                                                                    | Oral                                                                                                                          |  |
| 46                                                                    | Skin                                                                                                                          |  |
| 47                                                                    | Keroid                                                                                                                        |  |
| 48                                                                    | List other diseases. (If more than one, please list them all here.)                                                           |  |
| 49                                                                    | Number of patients with other diseases (Please provide the total number even if there is more than one disease.)              |  |
| LDR brachytherapy                                                     |                                                                                                                               |  |
| 50                                                                    | <sup>125</sup> I-125 seed implantation for prostate cancer                                                                    |  |
|                                                                       | LDR using <sup>192</sup> Ir                                                                                                   |  |
| 51                                                                    | List disease of LDR using <sup>192</sup> Ir. (If more than one, please list them all here.)                                   |  |
| 52                                                                    | Number of patients with LDR using <sup>192</sup> Ir. (Please provide the total number even if there is more than one disease) |  |

|    |                                                                                                                                                               |                                                                                                                                                                                                                                              |
|----|---------------------------------------------------------------------------------------------------------------------------------------------------------------|----------------------------------------------------------------------------------------------------------------------------------------------------------------------------------------------------------------------------------------------|
|    | LDR using <sup>137</sup> Cs                                                                                                                                   |                                                                                                                                                                                                                                              |
| 53 | List disease of LDR using <sup>137</sup> Cs. (If more than one, please list them all here.)                                                                   |                                                                                                                                                                                                                                              |
| 54 | Number of patients with LDR using <sup>137</sup> Cs (Please provide the total number even if there is more than one disease.)                                 |                                                                                                                                                                                                                                              |
|    | LDR using <sup>198</sup> Au grain                                                                                                                             |                                                                                                                                                                                                                                              |
| 55 | List disease of LDR using <sup>198</sup> Au grain. (If more than one, please list them all here.)                                                             |                                                                                                                                                                                                                                              |
| 56 | Number of patients with LDR using <sup>198</sup> Au grain (Please provide the total number even if there is more than one disease.)                           |                                                                                                                                                                                                                                              |
| 57 | Can you provide training in brachytherapy in your center?                                                                                                     | Yes · No                                                                                                                                                                                                                                     |
| 58 | Number of residents per center trained in BT in 2021                                                                                                          |                                                                                                                                                                                                                                              |
| 59 | Number of patients for training per resident in 2021 : Gynecological cancer                                                                                   |                                                                                                                                                                                                                                              |
| 60 | Number of patients for training per resident in 2021 : Prostate cancer                                                                                        |                                                                                                                                                                                                                                              |
| 61 | Number of patients for training per resident in 2021 : Head and neck cancer                                                                                   |                                                                                                                                                                                                                                              |
| 62 | The primary training method for BT. (Multiple choices allowed)                                                                                                | Resident-initiated delivery · Assistant of a radiation oncologist · Observation · Lectures                                                                                                                                                   |
| 63 | The diseases and treatment techniques that could be entrusted to be performed alone after the completion of training (Based on the opinions of the residents) | ICBT for gynecological cancer · IC/ISBT for gynecological cancer · ISBT for gynecological cancer · <sup>125</sup> I seed implantation for prostate cancer · ISBT for prostate cancer · Nothing · Other (If other, please state in the next.) |
| 64 | List all diseases and treatments in other cases.                                                                                                              |                                                                                                                                                                                                                                              |
| 65 | Do you think adequate brachytherapy training is available at your institution?                                                                                | Possible · Impossible · Undecided                                                                                                                                                                                                            |
| 66 | If you do not think adequate brachytherapy training is available or are undecided, what are the reasons? (Multiple choices allowed)                           | Insufficient instructors · Insufficient equipment · Problems securing resident time · Insufficient number of patients · Other (If other, please state in the next.)                                                                          |
| 67 | Please state if the reason is other.                                                                                                                          |                                                                                                                                                                                                                                              |
| 68 | Your opinions on what needs to be done to improve brachytherapy education (Free text)                                                                         |                                                                                                                                                                                                                                              |
